# Supplementary material for: Formononetin inhibits lipopolysaccharide-induced release of high mobility group box 1 by upregulating SIRT1 in a PPARδ-dependent manner
Source: PeerJ journal article supplement (doi:10.7717/peerj.4208), 2018-01-03
Supplement: Figure_1_RAW_data.pdf [file Figure_1_RAW_data.pdf]

RAW data

Figure 1A

| dose (µM) | 0      | 1      | 5      | 10     | 20     | 30     | 40     | 50     |
|-----------|--------|--------|--------|--------|--------|--------|--------|--------|
| n=1       | 2.083  | 2.19   | 2.085  | 2.036  | 2.183  | 2.169  | 1.671  | 1.36   |
| n=2       | 2.122  | 1.922  | 2.156  | 2.133  | 2.075  | 1.873  | 1.591  | 1.475  |
| n=3       | 2.078  | 2.091  | 2.191  | 2.081  | 2.048  | 1.916  | 1.705  | 1.31   |
| n=4       | 2.034  | 1.903  | 1.981  | 2.388  | 2.184  | 2.083  | 1.567  | 1.486  |
| average   | 2.0793 | 2.0265 | 2.1033 | 2.1595 | 2.1225 | 2.0103 | 1.6335 | 1.4077 |
| S.E       | 0.018  | 0.069  | 0.0463 | 0.0787 | 0.0356 | 0.0697 | 0.0326 | 0.0433 |

| dose (µM) | 0   | 1        | 5        | 10       | 20       | 30       | 40       | 50       |
|-----------|-----|----------|----------|----------|----------|----------|----------|----------|
| n=1       | 100 | 105.1368 | 100.096  | 97.74364 | 104.8008 | 104.1287 | 80.22084 | 65.29045 |
| n=2       | 100 | 90.57493 | 101.6023 | 100.5184 | 97.78511 | 88.26579 | 74.97644 | 69.5099  |
| n=3       | 100 | 100.6256 | 105.4379 | 100.1444 | 98.5563  | 92.20404 | 82.05005 | 63.04139 |
| n=4       | 100 | 93.55949 | 97.3943  | 117.4041 | 107.3746 | 102.409  | 77.04031 | 73.05801 |
| average   | 100 | 97.4742  | 101.1326 | 103.9526 | 102.1292 | 96.7519  | 78.5719  | 67.7249  |
| S.E       | 0   | 3.3112   | 1.6784   | 4.5258   | 2.3503   | 3.8635   | 1.5835   | 2.2265   |

RAW data

Figure 1B

| formonone | 0day | 1day | 2day | 3day | 4day | 5day |
|-----------|------|------|------|------|------|------|
| N=1       | 30   | 28   | 32   | 28   | 25   | 26   |
| N=2       | 28   | 26   | 22   | 20   | 21   | 31   |
| N=3       | 29   | 27   | 28   | 28   | 26   | 31   |
| N=4       |      | 24   | 30   | 31   | 31   | 19   |

RAW data

Figure 1D

| HMGB1 | Ponceau S | HMGB1/Pc fold | HMGB1    | Ponceau S | HMGB1/Pc fold | HMGB1    | Ponceau S | HMGB1/Pc fold |          |          |          |          |          |          |
|-------|-----------|---------------|----------|-----------|---------------|----------|-----------|---------------|----------|----------|----------|----------|----------|----------|
| 1     | 12677.82  | 30234.8       | 0.419312 | 1         | 6278.409      | 46715.68 | 0.134396  | 1             | 13365.46 | 46851.75 | 0.285271 | 1        |          |          |
| 2     | 41014.84  | 31755.34      | 1.291589 | 3.080256  | 2             | 30828.62 | 48447.78  | 0.636327      | 4.734709 | 2        | 40760.84 | 47057.15 | 0.866199 | 3.036404 |
| 3     | 18089.63  | 31993.7       | 0.565412 | 1.348428  | 3             | 14343.46 | 45536.44  | 0.314989      | 2.343732 | 3        | 13909.41 | 44047.53 | 0.315782 | 1.106953 |
| 4     | 23726.55  | 39990.38      | 0.593306 | 1.414951  | 4             | 8813.794 | 49656.51  | 0.177495      | 1.320687 | 4        | 2034.196 | 44934.8  | 0.04527  | 0.158691 |

  

| HMGB1 | actin    | HMGB1/ac fold | HMGB1    | actin    | HMGB1/ac fold | HMGB1    | actin    | HMGB1/ac fold |          |          |          |          |          |          |
|-------|----------|---------------|----------|----------|---------------|----------|----------|---------------|----------|----------|----------|----------|----------|----------|
| 1     | 38472.65 | 38137.53      | 1.008787 | 1        | 42066.58      | 37185.41 | 1.131266 | 1             | 42535.07 | 35078.65 | 1.212563 | 1        |          |          |
| 2     | 39365.2  | 42261.29      | 0.931472 | 0.923358 | 2             | 46486.8  | 40588.53 | 1.145319      | 1.012422 | 2        | 40919.75 | 39692.95 | 1.030907 | 0.850189 |
| 3     | 43609.41 | 39790.24      | 1.095983 | 1.086436 | 3             | 44792.34 | 39388.7  | 1.137187      | 1.005235 | 3        | 41512.34 | 41850.7  | 0.991915 | 0.818032 |
| 4     | 45760.8  | 33738.53      | 1.356337 | 1.344522 | 4             | 44417.77 | 41937.97 | 1.05913       | 0.936235 | 4        | 42225.82 | 42726.48 | 0.988282 | 0.815036 |

RAW data

Figure 1E

| hmgb1 | PonS     | HMGB1/pc fold | hmgb1    | PonS     | HMGB1/pc fold | hmgb1    | PonS     | HMGB1/pc fold |          |          |          |          |          |          |
|-------|----------|---------------|----------|----------|---------------|----------|----------|---------------|----------|----------|----------|----------|----------|----------|
| 1     | 5469.388 | 47185.7       | 0.115912 | 1        | 1594.255      | 21307.44 | 0.074822 | 1             | 6879.267 | 49834.24 | 0.138043 | 1        |          |          |
| 2     | 39408.02 | 47990.51      | 0.821163 | 7.084364 | 2             | 28492.5  | 32422.65 | 0.878784      | 11.74507 | 2        | 37128.72 | 43149.85 | 0.86046  | 6.233276 |
| 3     | 10747.66 | 47366.15      | 0.226906 | 1.957571 | 3             | 9822.217 | 33763.22 | 0.290915      | 3.888116 | 3        | 7212.823 | 40613.63 | 0.177596 | 1.286528 |
| 4     | 7444.338 | 47556.56      | 0.156537 | 1.350477 | 4             | 2911.631 | 34339.41 | 0.08479       | 1.133227 | 4        | 6614.388 | 45025    | 0.146905 | 1.064196 |

  

| hmgb1 | actin    | HMGB1/ac fold | hmgb1    | actin    | HMGB1/ac fold | hmgb1    | actin    | HMGB1/ac fold |          |          |          |          |          |          |
|-------|----------|---------------|----------|----------|---------------|----------|----------|---------------|----------|----------|----------|----------|----------|----------|
| 1     | 35637.07 | 37289.07      | 0.955697 | 1        | 34741.31      | 46003.45 | 0.755189 | 1             | 31307.12 | 44109.56 | 0.709758 | 1        |          |          |
| 2     | 34508.99 | 39049.36      | 0.883727 | 0.924694 | 2             | 31262.39 | 32462.66 | 0.963026      | 1.275212 | 2        | 36330.87 | 42945.95 | 0.845967 | 1.191909 |
| 3     | 38863    | 35183.63      | 1.104576 | 1.15578  | 3             | 36871.07 | 41477.51 | 0.888941      | 1.177111 | 3        | 37568.7  | 43542.25 | 0.86281  | 1.21564  |
| 4     | 34194.19 | 37401.07      | 0.914257 | 0.956639 | 4             | 33814.89 | 40348.65 | 0.838068      | 1.109745 | 4        | 39679.65 | 42395.7  | 0.935936 | 1.318669 |

RAW data

Figure 1F

| HMGB1 | laminB&tu | HMGB1/lo fold | HMGB1    | laminB&tu | HMGB1/lo fold | HMGB1    | laminB&tu | HMGB1/lo fold |          |          |          |          |          |          |
|-------|-----------|---------------|----------|-----------|---------------|----------|-----------|---------------|----------|----------|----------|----------|----------|----------|
| 1     | 17367.35  | 13231.15      | 1.31261  | 1         | 12199.5       | 16270.91 | 0.749773  | 1             | 17162.81 | 14448.98 | 1.187821 | 1        |          |          |
| 2     | 2229.891  | 16404.15      | 0.135935 | 0.10356   | 2             | 6118.598 | 17908.23  | 0.341664      | 0.45569  | 2        | 1925.77  | 17943.52 | 0.107324 | 0.090354 |
| 3     | 18053.15  | 18909.69      | 0.954704 | 0.727332  | 3             | 18920.69 | 20235.98  | 0.935002      | 1.247046 | 3        | 15243.15 | 16481.45 | 0.924867 | 0.778625 |
| 4     | 12204.96  | 17296.4       | 0.705636 | 0.537582  | 4             | 9824.062 | 16628.86  | 0.590784      | 0.78795  | 4        | 10996.55 | 16381.38 | 0.671284 | 0.565138 |
| 5     | 20399.28  | 16626.98      | 1.226878 | 0.934686  | 5             | 20113.88 | 17130.3   | 1.17417       | 1.566033 | 5        | 21574.76 | 18399.15 | 1.172595 | 0.987181 |
| 6     | 2632.305  | 15384.74      | 0.171098 | 0.13035   | 6             | 4964.962 | 15582.74  | 0.318619      | 0.424954 | 6        | 2619.113 | 20401.52 | 0.128378 | 0.108079 |
| 7     | 18483.98  | 13051.86      | 1.416195 | 1.078915  | 7             | 8904.569 | 13096.52  | 0.679919      | 0.906832 | 7        | 21994.98 | 15849.1  | 1.387775 | 1.168336 |
| 8     | 2958.326  | 21775.81      | 0.135854 | 0.103499  | 8             | 4282.255 | 20551.98  | 0.208362      | 0.2779   | 8        | 2610.79  | 21620.24 | 0.120757 | 0.101662 |

RAW data

Figure 1G

| Replicate | ↑GOI CT | Norm. CT | Relative Cc | Calibrator | Replicate | ↑GOI CT | Norm. CT | Relative Cc | Calibrator | n=1     | 1 | 1.03   | 0.96   | 1.03  |
|-----------|---------|----------|-------------|------------|-----------|---------|----------|-------------|------------|---------|---|--------|--------|-------|
| 1         | 21.82   | 16.22    | 1           | Yes        | 1         | 21.36   | 16.22    | 1           | Yes        | n=2     | 1 | 0.91   | 1.04   | 0.96  |
| 2         | 21.55   | 15.98    | 1.03        |            | 2         | 21.66   | 15.98    | 0.91        |            | n=3     | 1 | 0.99   | 0.96   | 0.94  |
| 3         | 22.02   | 16.31    | 0.96        |            | 3         | 21.24   | 16.31    | 1.04        |            | n=4     | 1 | 0.96   | 1.04   | 1.01  |
| 4         | 21.8    | 15.61    | 1.03        |            | 4         | 20.8    | 15.61    | 0.96        |            | average | 1 | 0.9725 | 1      | 0.985 |
|           |         |          |             |            |           |         |          |             |            | S.E     | 0 | 0.0253 | 0.0231 | 0.021 |

  

| Replicate | ↑GOI CT | Norm. CT | Relative Cc | Calibrator | Replicate | ↑GOI CT | Norm. CT | Relative Cc | Calibrator |
|-----------|---------|----------|-------------|------------|-----------|---------|----------|-------------|------------|
| 1         | 21.33   | 16.22    | 1           | Yes        | 1         | 21.84   | 16.22    | 1           | Yes        |
| 2         | 21.06   | 15.98    | 0.99        |            | 2         | 21.78   | 15.98    | 0.96        |            |
| 3         | 21.08   | 16.31    | 0.96        |            | 3         | 21.04   | 16.31    | 1.04        |            |
| 4         | 20.8    | 15.61    | 0.94        |            | 4         | 21.8    | 15.61    | 1.01        |            |
