# Supplementary material for: Formononetin inhibits lipopolysaccharide-induced release of high mobility group box 1 by upregulating SIRT1 in a PPARδ-dependent manner
Source: PubMed Central journal article supplement (PMC5756453; doi:10.7717/peerj.4208), 2018-01-03
Supplement: peerj-06-4208-s002.pdf [file peerj-06-4208-s002.pdf]

RAW data

Figure 2A

| formononetin dose |          |          |                 | formononetin dose |          |          |                 | formononetin dose |          |          |                 |          |          |          |
|-------------------|----------|----------|-----------------|-------------------|----------|----------|-----------------|-------------------|----------|----------|-----------------|----------|----------|----------|
|                   | SIRT1    | actin    | SIRT1/actirfold |                   | SIRT1    | actin    | SIRT1/actirfold |                   | SIRT1    | actin    | SIRT1/actirfold |          |          |          |
| 1                 | 12415.18 | 23929.3  | 0.518827        | 1                 | 9424.368 | 32132.61 | 0.293296        | 1                 | 11341.47 | 29196.95 | 0.388447        |          |          |          |
| 2                 | 14282.71 | 24157.83 | 0.591225        | 1.139541          | 2        | 17190.25 | 29431.18        | 0.584083          | 1.991445 | 2        | 11135.37        | 27134    | 0.410384 | 1.056474 |
| 3                 | 16164    | 20642.18 | 0.783057        | 1.509283          | 3        | 24335.3  | 29219.18        | 0.832854          | 2.839635 | 3        | 15032.83        | 27304.64 | 0.55056  | 1.417335 |
| 4                 | 18562.42 | 22417.59 | 0.828029        | 1.595963          | 4        | 24481.25 | 28565.47        | 0.857022          | 2.922039 | 4        | 16891.93        | 27306.57 | 0.618603 | 1.592504 |
| 5                 | 22874.95 | 23047    | 0.992535        | 1.913035          | 5        | 26794.78 | 29297.64        | 0.914571          | 3.118253 | 5        | 27878.08        | 27216.35 | 1.024314 | 2.636946 |
| 6                 | 25619.15 | 26142.9  | 0.979966        | 1.888808          | 6        | 25423.02 | 30709.54        | 0.827854          | 2.822589 | 6        | 24166.42        | 25452.42 | 0.949474 | 2.444283 |

RAW data

Figure 2B

| formononetin TIME |          |          |                 | formononetin TIME |          |          |                 | formononetin TIME |          |          |                 |          |          |          |
|-------------------|----------|----------|-----------------|-------------------|----------|----------|-----------------|-------------------|----------|----------|-----------------|----------|----------|----------|
|                   | SIRT1    | actin    | SIRT1/actirfold |                   | SIRT1    | actin    | SIRT1/actirfold |                   | SIRT1    | actin    | SIRT1/actirfold |          |          |          |
| 1                 | 9812.811 | 18992.71 | 0.516662        | 1                 | 12097.18 | 24298.95 | 0.497848        | 1                 | 8024.569 | 26529.22 | 0.30248         |          |          |          |
| 2                 | 9538.953 | 22412    | 0.425618        | 0.823784          | 2        | 16068.88 | 25282.83        | 0.635565          | 1.276626 | 2        | 12981.3         | 24280.81 | 0.534632 | 1.767493 |
| 3                 | 10410.64 | 21907.42 | 0.475211        | 0.919771          | 3        | 21460.3  | 26271.42        | 0.816869          | 1.640801 | 3        | 15290.83        | 25678.81 | 0.595465 | 1.968607 |
| 4                 | 12356.83 | 24244.83 | 0.509669        | 0.986465          | 4        | 25133.47 | 21920.23        | 1.146588          | 2.303091 | 4        | 13729.3         | 28641.05 | 0.479357 | 1.584754 |
| 5                 | 20615.71 | 25289    | 0.815205        | 1.57783           | 5        | 27389.93 | 29883.42        | 0.91656           | 1.841045 | 5        | 21474.66        | 29630.98 | 0.724737 | 2.395979 |
| 6                 | 27581.59 | 28677.66 | 0.96178         | 1.861526          | 6        | 23521.42 | 23802.83        | 0.988177          | 1.984899 | 6        | 25405           | 31639.13 | 0.802962 | 2.65459  |

RAW data

Figure 2C

|         |   |        |        |        |        |        |
|---------|---|--------|--------|--------|--------|--------|
| n=1     | 1 | 0.75   | 1.7    | 2.14   | 3.8    | 4.52   |
| n=2     | 1 | 0.94   | 1.86   | 3.23   | 3.7    | 3.96   |
| n=3     | 1 | 1.03   | 1.2    | 2.38   | 4.02   | 4.12   |
| average | 1 | 0.9067 | 1.5867 | 2.5833 | 3.84   | 4.2    |
| S.E     | 0 | 0.0825 | 0.1988 | 0.3307 | 0.0945 | 0.1665 |

RAW data

Figure 2E

|         |   |        |        |        |        |        |
|---------|---|--------|--------|--------|--------|--------|
| n=1     | 1 | 3.97   | 2.01   | 1.48   | 0.92   | 0.48   |
| n=2     | 1 | 2.28   | 1.31   | 1.35   | 1.01   | 0.89   |
| n=3     | 1 | 3.5    | 1.03   | 1.09   | 0.24   | 1.02   |
| average | 1 | 3.25   | 1.45   | 1.3067 | 0.7233 | 0.7967 |
| S.E     | 0 | 0.5036 | 0.2914 | 0.1146 | 0.2431 | 0.1627 |

RAW data

Figure 2H

| SIRT1 lucif B-gal |             |       |          | SIRT1 lucif B-gal |             |       |          | SIRT1 lucif B-gal |             |       |          |       |          |          |
|-------------------|-------------|-------|----------|-------------------|-------------|-------|----------|-------------------|-------------|-------|----------|-------|----------|----------|
|                   | lucifer/b-g | Fold  |          |                   | lucifer/b-g | Fold  |          |                   | lucifer/b-g | Fold  |          |       |          |          |
| 1                 | 8241        | 0.102 | 80794.12 | 1                 | 16056       | 0.121 | 132694.2 | 1                 | 16524       | 0.122 | 135442.6 |       |          |          |
| 2                 | 27532       | 0.118 | 233322   | 2.887859          | 12          | 34215 | 0.114    | 300131.6          | 2.261829    | 22    | 29442    | 0.109 | 270110.1 | 1.994277 |
| 3                 | 16022       | 0.111 | 144342.3 | 1.786545          | 13          | 21255 | 0.117    | 181666.7          | 1.369062    | 23    | 19394    | 0.113 | 171628.3 | 1.267166 |
| 4                 | 9880        | 0.112 | 88214.29 | 1.09184           | 14          | 10616 | 0.108    | 98296.3           | 0.740773    | 24    | 9299     | 0.104 | 89413.46 | 0.660157 |
