# Supplementary material for: Formononetin inhibits lipopolysaccharide-induced release of high mobility group box 1 by upregulating SIRT1 in a PPARδ-dependent manner
Source: PubMed Central journal article supplement (PMC5756453; doi:10.7717/peerj.4208), 2018-01-03
Supplement: peerj-06-4208-s003.pdf [file peerj-06-4208-s003.pdf]

RAW data

Figure 3A

|   | SIRT1    | actin    | SIRT1/actirfold |          | SIRT1    | actin    | SIRT1/actirfold |          | SIRT1    | actin    | SIRT1/actirfold |          |          |          |
|---|----------|----------|-----------------|----------|----------|----------|-----------------|----------|----------|----------|-----------------|----------|----------|----------|
| 1 | 18267.24 | 27602.95 | 0.661786        | 1        | 23013.24 | 42677.58 | 0.539235        | 1        | 32888.79 | 36529.19 | 0.900343        | 1        |          |          |
| 2 | 4303.468 | 38260.14 | 0.112479        | 0.169963 | 2        | 7228.61  | 38786.92        | 0.186367 | 0.345614 | 2        | 10908.82        | 37334.27 | 0.292193 | 0.324536 |
| 3 | 14961.95 | 25391.41 | 0.589252        | 0.890397 | 3        | 18285.41 | 38581.22        | 0.473946 | 0.878923 | 3        | 27113.02        | 46437.8  | 0.583857 | 0.648482 |
| 4 | 44390.44 | 27230.48 | 1.630175        | 2.463296 | 4        | 37144.55 | 38434.31        | 0.966443 | 1.792248 | 4        | 46399.29        | 32001.87 | 1.449893 | 1.610378 |

LPS+Formononetin: HMGB1

|   | HMGB1    | PonS     | HMGB1/Pcfold |          |
|---|----------|----------|--------------|----------|
| 1 | 5906.024 | 39339.7  | 0.150129     | 1        |
| 2 | 38088.29 | 43027.7  | 0.885204     | 5.896294 |
| 3 | 20568.36 | 41224.63 | 0.498934     | 3.32337  |
| 4 | 6054.539 | 32876.36 | 0.184161     | 1.226685 |

LPS+Formononetin: HMGB1

|   | HMGB1    | PonS     | HMGB1/Pcfold |          |
|---|----------|----------|--------------|----------|
| 1 | 12686.7  | 29949    | 0.42361      | 1        |
| 2 | 31218.67 | 19181.34 | 1.627555     | 3.842103 |
| 3 | 18311.24 | 23964.17 | 0.764109     | 1.803802 |
| 4 | 23622.43 | 40170.14 | 0.588059     | 1.388209 |

LPS+Formononetin: HMGB1

|   | HMGB1    | PonS     | HMGB1/Pcfold |          |
|---|----------|----------|--------------|----------|
| 1 | 8215.752 | 24192.29 | 0.339602     | 1        |
| 2 | 29085.43 | 20250.34 | 1.436294     | 4.229342 |
| 3 | 9445.903 | 22568.17 | 0.41855      | 1.232471 |
| 4 | 5095.752 | 32269.6  | 0.157912     | 0.464991 |

RAW data

Figure 3C

|   | HMGB1    | Pon S    | HMGB1/Pcfold |          | HMGB1    | Pon S    | HMGB1/Pcfold |          | HMGB1    | Pon S    | HMGB1/Pcfold |          |          |          |
|---|----------|----------|--------------|----------|----------|----------|--------------|----------|----------|----------|--------------|----------|----------|----------|
| 1 | 1626.284 | 24023.62 | 0.067695     | 1        | 2906.669 | 25190.45 | 0.115388     | 1        | 1323.778 | 21776.74 | 0.060789     | 1        |          |          |
| 2 | 15464.98 | 25343.57 | 0.610213     | 9.014128 | 2        | 21819.76 | 24210.45     | 0.901254 | 7.810655 | 2        | 20194.81     | 24375.86 | 0.828476 | 13.6288  |
| 3 | 8785.033 | 26803.15 | 0.327761     | 4.841719 | 3        | 8575.276 | 28667.47     | 0.299129 | 2.592382 | 3        | 3888.426     | 27542.93 | 0.141177 | 2.322423 |
| 4 | 12141.91 | 21608.33 | 0.561909     | 8.300572 | 4        | 13517.15 | 22622.74     | 0.597503 | 5.178218 | 4        | 10126.1      | 19580.55 | 0.517151 | 8.507369 |
| 5 | 19576.71 | 25266.81 | 0.774799     | 11.44541 | 5        | 16483.52 | 24618.86     | 0.669548 | 5.802595 | 5        | 22369.23     | 23536.4  | 0.95041  | 15.63467 |
| 6 | 1435.577 | 27618.45 | 0.051979     | 0.767837 | 6        | 3057.87  | 27682.52     | 0.110462 | 0.957312 | 6        | 1221.607     | 26093.4  | 0.046817 | 0.770156 |
| 7 | 1398.87  | 22948.45 | 0.060957     | 0.900463 | 7        | 3258.284 | 23026.28     | 0.141503 | 1.226325 | 7        | 1218.121     | 22765.03 | 0.053508 | 0.880237 |

RAW data

Figure 3D

|   | HMGB1    | ponS     | HMGB1/Pcfold |          | HMGB1    | ponS     | HMGB1/Pcfold |          | HMGB1    | ponS     | HMGB1/Pcfold |          |          |          |
|---|----------|----------|--------------|----------|----------|----------|--------------|----------|----------|----------|--------------|----------|----------|----------|
| 1 | 1551.184 | 11043.86 | 0.140457     | 1        | 1684.598 | 19085.62 | 0.088265     | 1        | 1213.163 | 10317.15 | 0.117587     | 1        |          |          |
| 2 | 24393.47 | 17459.28 | 1.397164     | 9.947294 | 2        | 23341.47 | 19362.15     | 1.20552  | 13.65792 | 2        | 21025.18     | 10069.5  | 2.088006 | 17.75712 |
| 3 | 3756.163 | 15005.5  | 0.250319     | 1.78218  | 3        | 9288.497 | 19760.91     | 0.470044 | 5.325353 | 3        | 3987.598     | 16712.45 | 0.2386   | 2.02914  |
| 4 | 9610.619 | 9026.376 | 1.064726     | 7.58046  | 4        | 16677.5  | 15408.38     | 1.082366 | 12.26264 | 4        | 11472.13     | 13591.91 | 0.844041 | 7.178016 |
| 5 | 20502.57 | 13072.62 | 1.56836      | 11.16615 | 5        | 19576.23 | 9239.761     | 2.118694 | 24.0037  | 5        | 20469.35     | 10008.08 | 2.045281 | 17.39377 |
| 6 | 2193.062 | 7703.619 | 0.284679     | 2.026813 | 6        | 1086.87  | 16906.3      | 0.064288 | 0.728348 | 6        | 3057.991     | 21984.1  | 0.1391   | 1.182955 |
| 7 | 578.163  | 12659.86 | 0.045669     | 0.325146 | 7        | 1031.506 | 12823.64     | 0.080438 | 0.911319 | 7        | 3262.841     | 20815.98 | 0.156747 | 1.333029 |

RAW data

Figure 3E

|   | HMGB1    | ponS     | HMGB1/Pcfold |          | HMGB1    | ponS     | HMGB1/Pcfold |          | HMGB1    | ponS     | HMGB1/Pcfold |          |          |          |
|---|----------|----------|--------------|----------|----------|----------|--------------|----------|----------|----------|--------------|----------|----------|----------|
| 1 | 1240.326 | 15611.64 | 0.079449     | 1        | 2165.426 | 17942.62 | 0.120686     | 1        | 1061.284 | 4487.033 | 0.236522     | 1        |          |          |
| 2 | 21209.76 | 18788.23 | 1.128886     | 14.20897 | 2        | 26080.88 | 16136.98     | 1.616218 | 13.39191 | 2        | 20031.98     | 7469.569 | 2.681812 | 11.33851 |
| 3 | 7678.912 | 16147.1  | 0.47556      | 5.985738 | 3        | 12297.91 | 16403.86     | 0.749696 | 6.211948 | 3        | 12792.21     | 7500.397 | 1.705537 | 7.210889 |
| 4 | 2510.64  | 9811.205 | 0.255895     | 3.220882 | 4        | 2382.991 | 13403.03     | 0.177795 | 1.4732   | 4        | 5817.426     | 4960.397 | 1.172774 | 4.958406 |
| 5 | 10051.62 | 16232.91 | 0.619212     | 7.793854 | 5        | 8233.012 | 18956.03     | 0.434321 | 3.598767 | 5        | 13035.86     | 7640.69  | 1.70611  | 7.213313 |
| 6 | 1077.355 | 14230.45 | 0.075708     | 0.952912 | 6        | 718.749  | 16505.21     | 0.043547 | 0.360827 | 6        | 2814.82      | 9858.569 | 0.28552  | 1.207159 |
| 7 | 762.113  | 14661.52 | 0.05198      | 0.654264 | 7        | 1192.163 | 6865.841     | 0.173637 | 1.438747 | 7        | 3087.577     | 9816.134 | 0.314541 | 1.329857 |
