# Supplementary material for: Formononetin inhibits lipopolysaccharide-induced release of high mobility group box 1 by upregulating SIRT1 in a PPARδ-dependent manner
Source: PubMed Central journal article supplement (PMC5756453; doi:10.7717/peerj.4208), 2018-01-03
Supplement: peerj-06-4208-s004.pdf [file peerj-06-4208-s004.pdf]

RAW data

Figure 4A

| LPS+Formononetin: acetyl-HMGB1 |          |          |                |          | LPS+Formononetin: acetyl-HMGB1 |          |                |          |            | LPS+Formononetin: acetyl-HMGB1 |                |          |  |  |
|--------------------------------|----------|----------|----------------|----------|--------------------------------|----------|----------------|----------|------------|--------------------------------|----------------|----------|--|--|
|                                | acetyl   | HMGB1    | acetyl/HM fold |          | acetyl                         | HMGB1    | acetyl/HM fold |          | acetyl     | HMGB1                          | acetyl/HM fold |          |  |  |
| 1                              | 22568.54 | 32312.39 | 0.698449       | 1        | 1 8799.933                     | 17545.9  | 0.501538       | 1        | 1 11558.27 | 17747.71                       | 0.651254       | 1        |  |  |
| 2                              | 55704.51 | 31089.54 | 1.791744       | 2.565321 | 2 35203.46                     | 23311.97 | 1.510102       | 3.010944 | 2 40521.1  | 19485.9                        | 2.079508       | 3.193083 |  |  |
| 3                              | 18029.27 | 28616.2  | 0.630037       | 0.902052 | 3 27404.39                     | 23960.32 | 1.143741       | 2.280468 | 3 12312.02 | 23001.61                       | 0.535268       | 0.821904 |  |  |
| 4                              | 18864.27 | 25998.13 | 0.725601       | 1.038876 | 4 17951.95                     | 23624.97 | 0.759872       | 1.515084 | 4 7825.924 | 25252.61                       | 0.309906       | 0.47586  |  |  |
| 5                              | 8171.347 | 26476.25 | 0.308629       | 0.441878 | 5 6432.828                     | 31211.34 | 0.206105       | 0.410947 | 5 6971.024 | 29254.87                       | 0.238286       | 0.365888 |  |  |

RAW data

Figure 4B

| LPS+Formononetin: acetyl-HMGB1 |          |          |                |          | LPS+Formononetin: acetyl-HMGB1 |          |                |          |            | LPS+Formononetin: acetyl-HMGB1 |                |          |  |  |
|--------------------------------|----------|----------|----------------|----------|--------------------------------|----------|----------------|----------|------------|--------------------------------|----------------|----------|--|--|
|                                | acetyl   | HMGB1    | acetyl/HM fold |          | acetyl                         | HMGB1    | acetyl/HM fold |          | acetyl     | HMGB1                          | acetyl/HM fold |          |  |  |
| 1                              | 1524.406 | 25267.98 | 0.06033        | 1        | 1 4848.033                     | 21556.81 | 0.224896       | 1        | 1 5680.669 | 26512.52                       | 0.214264       | 1        |  |  |
| 2                              | 10067.18 | 26489.64 | 0.380042       | 6.299433 | 2 22010.95                     | 22347.91 | 0.984922       | 4.379463 | 2 22096.64 | 23830.38                       | 0.927247       | 4.327597 |  |  |
| 3                              | 3297.861 | 22953.38 | 0.143677       | 2.381528 | 3 6119.79                      | 23868.91 | 0.256392       | 1.140047 | 3 11758.1  | 24287.6                        | 0.48412        | 2.259458 |  |  |
| 4                              | 10239.1  | 29470.26 | 0.347439       | 5.759012 | 4 16027.64                     | 23743.91 | 0.675021       | 3.001486 | 4 25993.35 | 26877.69                       | 0.967098       | 4.513586 |  |  |
| 5                              | 10906.71 | 23388.5  | 0.466328       | 7.729678 | 5 13797.57                     | 23251.26 | 0.593412       | 2.63861  | 5 20848.23 | 23105.26                       | 0.902315       | 4.211238 |  |  |
| 6                              | 2010.134 | 22190.79 | 0.090584       | 1.501489 | 6 5885.083                     | 21409.18 | 0.274886       | 1.222282 | 6 13886.98 | 28011.76                       | 0.495755       | 2.313764 |  |  |
| 7                              | 3869.518 | 28154.25 | 0.13744        | 2.278153 | 7 10857.47                     | 29785.13 | 0.364527       | 1.62087  | 7 10031.31 | 23510.81                       | 0.426668       | 1.991322 |  |  |

RAW data

Figure 4C

| acetyl-HM HMGB1 |           |          |                |          | acetyl-HM HMGB1 |          |                |          |            | acetyl-HM HMGB1 |                |          |  |  |
|-----------------|-----------|----------|----------------|----------|-----------------|----------|----------------|----------|------------|-----------------|----------------|----------|--|--|
|                 | acetyl-HM | HMGB1    | acetyl/HM fold |          | acetyl-HM       | HMGB1    | acetyl/HM fold |          | acetyl-HM  | HMGB1           | acetyl/HM fold |          |  |  |
| 1               | 3900.719  | 27020.05 | 0.144364       | 1        | 1 1234.447      | 17489.35 | 0.070583       | 1        | 1 519.213  | 25612.4         | 0.020272       | 1        |  |  |
| 2               | 20891.93  | 25407.45 | 0.822276       | 5.695858 | 2 9015.832      | 17644.15 | 0.510981       | 7.239459 | 2 3991.267 | 26740.03        | 0.149262       | 7.362978 |  |  |
| 3               | 6306.154  | 24413.52 | 0.258306       | 1.789269 | 3 2437.912      | 26202.15 | 0.093042       | 1.318203 | 3 2098.74  | 26056.69        | 0.080545       | 3.973233 |  |  |
| 4               | 14012.23  | 23261.52 | 0.602378       | 4.172637 | 4 10682.25      | 24466.62 | 0.436605       | 6.185713 | 4 3541.64  | 24587.57        | 0.144042       | 7.105481 |  |  |
| 5               | 24391.13  | 24500.52 | 0.995535       | 6.896014 | 5 13673.83      | 22882.69 | 0.597562       | 8.466118 | 5 2813.861 | 24980.45        | 0.112643       | 5.556574 |  |  |
| 6               | 4221.548  | 23013.4  | 0.183439       | 1.270669 | 6 1183.841      | 20332.55 | 0.058224       | 0.824903 | 6 661.263  | 22215.96        | 0.029765       | 1.468297 |  |  |
| 7               | 1906.234  | 21155.52 | 0.090106       | 0.624157 | 7 928.255       | 24605    | 0.037726       | 0.534497 | 7 542.912  | 21162.81        | 0.025654       | 1.265496 |  |  |
